# Supplementary material for: Characterization of Bioactivities and Biosynthesis of Angucycline/Angucyclinone Derivatives Derived from Gephyromycinifex aptenodytis gen. nov., sp. nov.
Source: MDPI journal article supplement (doi:10.3390/md20010034), 2021-12-29
Supplement: s1 [file s1]

## Supplementary Materials

# Characterization of Bioactivities and Biosynthesis of Angucycline/Angucyclinone Derivatives Derived from *Gephyromycinifex aptenodytis* gen. nov., sp. nov.

Wen-Zhuo Zhu <sup>1</sup>, Shu-Heng Wang <sup>1</sup>, Hui-Min Gao <sup>1</sup>, Ya-Ming Ge <sup>2</sup>, Jun Dai <sup>3</sup>,  
Xiao-Ling Zhang <sup>1,4,\*</sup> and Qiao Yang <sup>1,4,5,\*</sup>

<sup>1</sup> Department of Marine Chemistry, College of Marine Science and Technology, Zhejiang Ocean University, Zhoushan 316022, China; zhuwenzhuo@zjou.edu.cn (W.-Z.Z.); wangshuheng@zjou.edu.cn (S.-H.W.); gaohuimin@zjou.edu.cn (H.-M.G.)

<sup>2</sup> National Engineering Research Center for Marine Aquaculture, Zhejiang Ocean University, Zhoushan 316021, China; geyaming@zjou.edu.cn

<sup>3</sup> Natural “111” Center for Cellular Regulation and Molecular Pharmaceutics, Key Laboratory of Fermentation Engineering (Ministry of Education), College of Bioengineering, Hubei University of Technology, Wuhan 430068, China; jundai@hbut.edu.cn

<sup>4</sup> ABI Group, Zhejiang Ocean University, Zhoushan 316022, China

<sup>5</sup> Department of Environment Science and Engineering, Zhejiang Ocean University, Zhoushan 316022, China

\* Correspondence: zhangxiaoling@zjou.edu.cn (X.-L.Z.); qiaoyang1979@whu.edu.cn (Q.Y.)

**Figure S1.** The NMR spectra data of 2-hydroxy-frigocyclinone (2-HF).

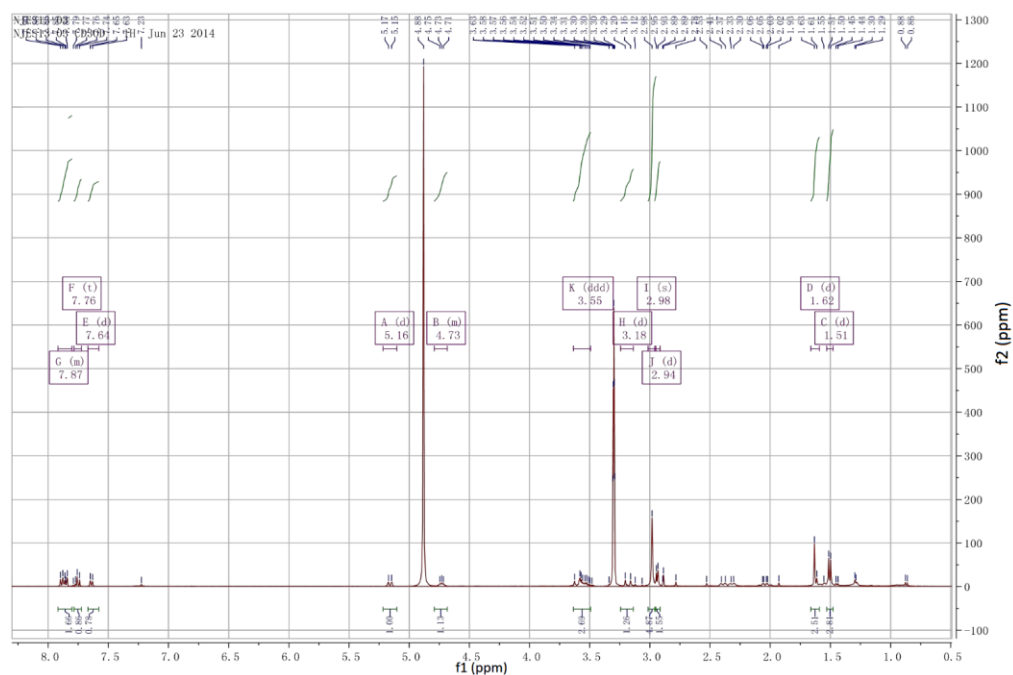

(1) <sup>1</sup>H NMR spectrum

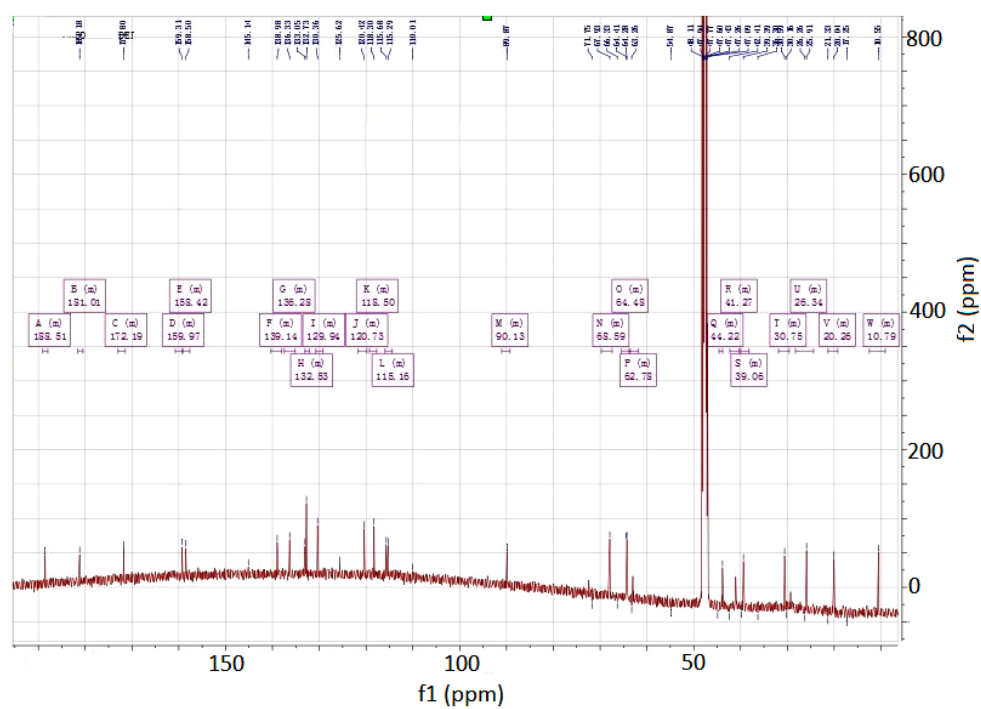

(2) <sup>13</sup>C NMR spectrum

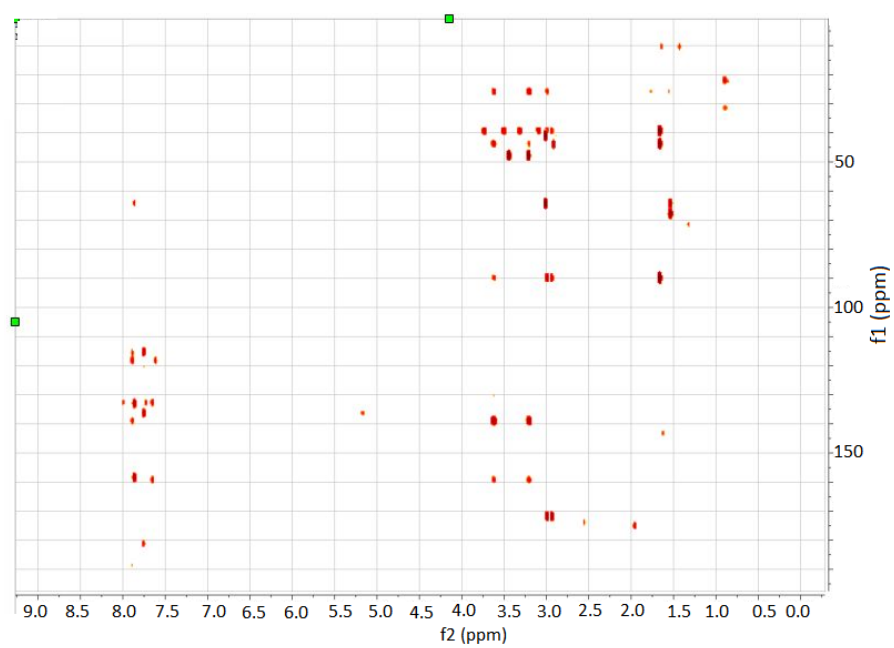

(3) HMBC spectrum
